# Supplementary material
Source: MDPI journal article supplement (https://www.mdpi.com/2227-9040/12/5/77)
Supplement: s1 [file s1 › chemosensors-2918230-supplementary.pdf]

**Liquid-phase Exfoliated Graphene and  
Polytetrafluoroethylene for Highly Durable and  
Reusable Chemical Leak Detection Sensors**

SUPPLEMENTARY INFORMATION

**Table S1. Electrical conductivity analysis results**

| Sr. No | Load [kgf] | Thickness [mm] | Resistance [ $\Omega$ ] | SR [ $\Omega$ /sq] | VR [ $\Omega$ cm] | Conductivity [S/cm] | Density [g/cm <sup>3</sup> ] |
|--------|------------|----------------|-------------------------|--------------------|-------------------|---------------------|------------------------------|
| 1      | 196.50     | 1.45           | 0.61                    | 2.76               | 0.40              | 2.50                | 0.6337                       |
| 2      | 201.00     | 1.20           | 0.16                    | 0.73               | 0.09              | 11.50               | 0.767                        |
| 3      | 197.00     | 1.07           | 0.80                    | 3.62               | 0.39              | 2.58                | 0.86                         |

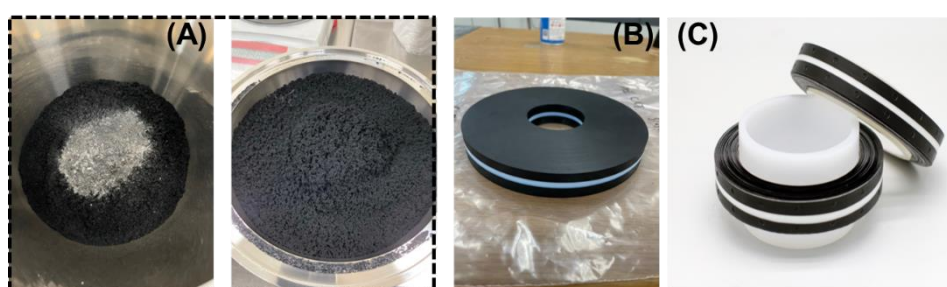

**Figure S1: Fabrication of LPEG-PTFE composite and sensor strips.**

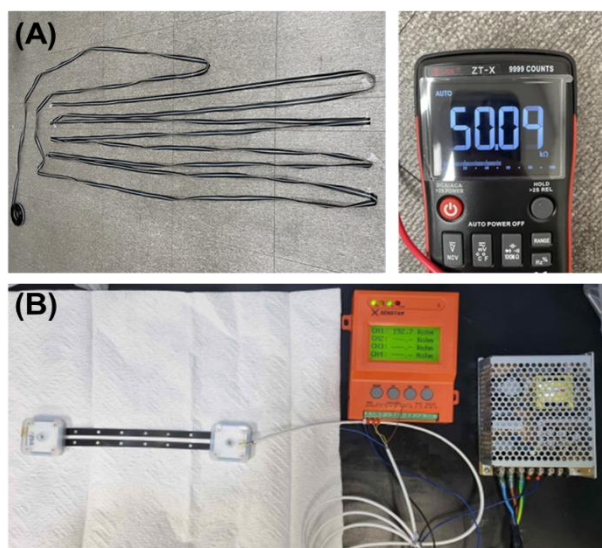

**Figure S2. Photographs of LPEG-PTFE sensor and system.**

**Table S2. Corrosion Resistance Test of the LPEG-PTFE sensor.**

| Solvents for treatment                          | Before Immersion (k $\Omega$ ) | After Immersion (k $\Omega$ ) | %age Difference |
|-------------------------------------------------|--------------------------------|-------------------------------|-----------------|
| <i>H</i> <sub>2</sub> <i>SO</i> <sub>4</sub> #1 | 187.1                          | 191.5                         | 2.35            |
| <i>H</i> <sub>2</sub> <i>SO</i> <sub>4</sub> #2 | 171.6                          | 187.6                         | 9.32            |
| <i>H</i> <sub>2</sub> <i>SO</i> <sub>4</sub> #3 | 190.6                          | 191.2                         | 0.31            |
| HF #1                                           | 183.1                          | 187.4                         | 2.35            |
| HF #2                                           | 184.1                          | 192.0                         | 4.29            |
| HF #3                                           | 182.2                          | 192.9                         | 5.87            |
| NaOH #1                                         | 194.8                          | 191.5                         | -1.69           |
| NaOH #2                                         | 181.8                          | 189.6                         | 4.29            |
| NaOH #3                                         | 174.3                          | 186.8                         | 7.17            |

**Table S3. Sheet Resistance measurements of LPEG-PTFE sensor strip.**

| Probe Position | Surface Resistance | Probe Position | Surface Resistance |
|----------------|--------------------|----------------|--------------------|
| #1             | 8.40 $\Omega$      | #6             | 8.16 $\Omega$      |
| #2             | 7.92 $\Omega$      | #7             | 8.37 $\Omega$      |
| #3             | 9.03 $\Omega$      | #8             | 8.64 $\Omega$      |
| #4             | 8.22 $\Omega$      | #9             | 7.52 $\Omega$      |
| #5             | 8.35 $\Omega$      | #10            | 8.85 $\Omega$      |

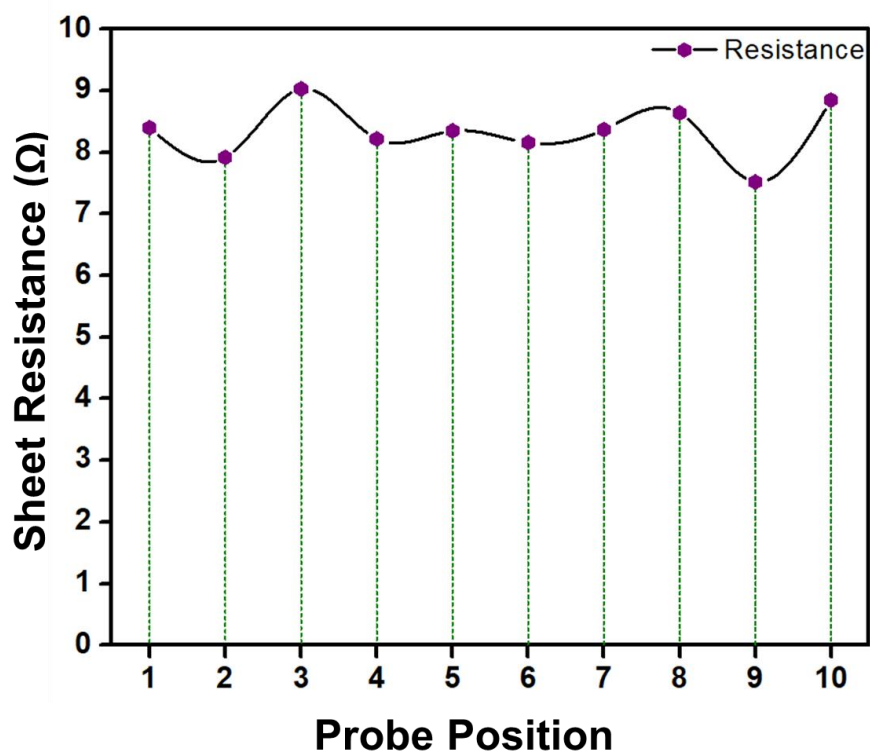

**Figure S3:** Sheet resistance measurements of the LPEG-PTFE sensors.

**Table S4:** Dust resistance test of the LPEG-PTFE sensors

| Sr. No | Before Dust Resistance Test (kΩ) | After Dust Resistance Test (kΩ) | %age Difference |
|--------|----------------------------------|---------------------------------|-----------------|
| #1     | 194.1                            | 194.8                           | 0.4             |
| #2     | 193.8                            | 193.8                           | 0.0             |
| #3     | 196.1                            | 195.0                           | -0.6            |

**Table S5:** Thermal Shock Test of the LPEG-PTFE sensors

| Sr. No | Before Thermal Shock Test (kΩ) | After Thermal Shock Test (kΩ) | %age Difference |
|--------|--------------------------------|-------------------------------|-----------------|
| #1     | 194.1                          | 194.6                         | -0.26           |
| #2     | 193.5                          | 193.4                         | -0.10           |
| #3     | 195.7                          | 195.2                         | -0.26           |

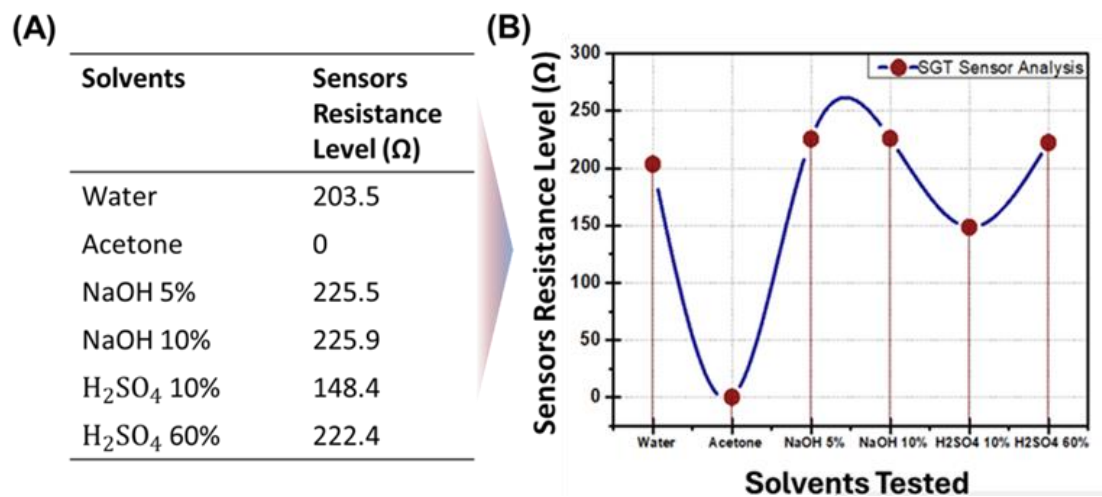

**Figure S4.** Resistance of the LPEG-PTFE sensors upon contact with water, 10% H<sub>2</sub>SO<sub>4</sub>, and 5% NaOH solution.
